# Supplementary material for: Synthesis of cyclic N1-pentylinosine phosphate, a new structurally reduced cADPR analogue with calcium-mobilizing activity on PC12 cells
Source: publisher site journal article supplement (doi:10.3762/bjoc.11.289), 2015-12-22
Supplement: Additional file 1 [file 1860-5397-11-289-S1.pdf]

## Supporting Information

for

# Synthesis of cyclic $N^1$ -pentylinosine phosphate, a new structurally reduced cADPR analogue with calcium-mobilizing activity on PC12 cells

Ahmed Mahal<sup>‡,1</sup>, Stefano D'Errico<sup>‡,1</sup>, Nicola Borbone<sup>1</sup>, Brunella Pinto<sup>1</sup>, Agnese Secondo<sup>2</sup>, Valeria Costantino<sup>1</sup>, Valentina Tedeschi<sup>2</sup>, Giorgia Oliviero<sup>\*,1</sup>, Vincenzo Piccialli<sup>3</sup> and Gennaro Piccialli<sup>1,4</sup>

Address: <sup>1</sup>Dipartimento di Farmacia, Università degli Studi di Napoli Federico II, Via D.

Montesano 49, 80131, Napoli, Italy, <sup>2</sup>Dipartimento di Neuroscienze e Scienze Riproduttive ed

Odontostomatologiche, Università degli Studi di Napoli Federico II, Via Pansini 5, 80131 Napoli,

Italy, <sup>3</sup>Dipartimento di Scienze Chimiche, Università degli Studi di Napoli Federico II, Napoli, Italy

and <sup>4</sup>Institute of Protein Biochemistry, National Council Research of Italy, Via Pietro Castellino

111, 80131 Napoli, Italy

Email: Giorgia Oliviero - golivier@unina.it

\*Corresponding author

‡These authors contributed equally

## Structural characterizations

**2',3'-O-Isopropylidene-N<sup>1</sup>-[5''-O-(2-cyanoethyl-N,N-diisopropylphosphoramidite)pentyl] inosine (7)**

Compound **5** (70 mg, 0.18 mmol) was coevaporated with anhydrous benzene (3 × 1 mL) and then dissolved in anhydrous THF (1.0 mL). To this solution DIPEA (0.040 mL, 0.21 mmol) and then (iPr)<sub>2</sub>NP(OCE)Cl (0.050 mL, 0.21 mmol) were added and the mixture was stirred at room temperature for 1 h. After the completion of the reaction (TLC monitoring: hexane/AcOEt, 6:4), the mixture was diluted with AcOEt (10 mL) and extracted with buffer phosphate solution at pH 7 (2 × 10 mL). The organic layer was separated and dried over anhydrous Na<sub>2</sub>SO<sub>4</sub>. The solvent was evaporated under reduced pressure and the crude was purified over 2% KOH coated silica gel column eluted with increasing amounts of AcOEt in hexane (from 20 to 40%). The fractions were collected and the solvents removed under reduced pressure, affording pure compound **7** (75 mg, 70%) as a 1:1 mixture of diastereomers.

Oil; <sup>1</sup>H NMR (400 MHz, acetone-*d*<sub>6</sub>, assignments by HH-COSY experiment) δ 8.34 (s, 1H, 2 x 2-H), 8.23 (s, 0.5H, 8-H), 8.20 (s, 0.5H, 8-H), 6.22-6.18 (two overlapped doublets, *J* = 3.7, 2.8 Hz, 1H, 2 x 1'-H), 5.40-5.33 (two overlapped multiplets, 1H, 2 x 2'-H), 5.13-5.06 (two overlapped multiplets, 1H, 2 x 3'-H), 4.46-4.39 (two overlapped multiplets, 1H, 2 x 4'-H), 4.11 (two overlapped triplets, *J* = 7.1 Hz, 2H, 2 x CH<sub>2</sub>N), 4.00-3.80 (complex signal, 4H, 2 x CH<sub>2</sub>OP and 2 x CNCH<sub>2</sub>CH<sub>2</sub>OP), 3.70-3.60 (complex signal, 2H, 2 x 5'-H<sub>a,b</sub>), 2.84-2.78 (two overlapped multiplets, 2H, 2 x CHN), 2.75 (two overlapped triplets, *J* = 6.1 Hz, 2H, 2 x CH<sub>2</sub>CN), 1.88-1.77 (two overlapped multiplets, 2H, 2 x CH<sub>2</sub>), 1.73-1.62 (two overlapped multiplets, 2H, 2 x CH<sub>2</sub>), 1.57 (two overlapped singlets, 3H, 2 x CH<sub>3</sub>), 1.54-1.44 (two overlapped multiplets, 2H, 2 x CH<sub>2</sub>), 1.36 (two overlapped singlets, 3H, 2 x CH<sub>3</sub>), 1.18 (d, *J* = 3.4 Hz, 6H, 4 x CH<sub>3</sub>CHN), 1.16 (d, *J* = 2.2 Hz, 6H, 4 x CH<sub>3</sub>CHN). <sup>31</sup>P NMR (202 MHz, CD<sub>3</sub>OD) δ 149.5 (s). HRESI-MS *m/z* 595.3015 ([M+H]<sup>+</sup>, requires 595.3009); UV (H<sub>2</sub>O) λ<sub>max</sub> 266 nm.

**2',3'-O-Isopropylidene-N<sup>1</sup>-[5''-O-(bis(2-cyanoethyl)phosphate)pentyl] inosine (9)**

Compound **5** (70 mg, 0.18 mmol) was coevaporated with anhydrous benzene (3 × 2 mL) and then dissolved in anhydrous THF (1.0 mL). To this solution (iPr)<sub>2</sub>NP(OCE)<sub>2</sub> (57 mg, 0.21 mmol) and 1*H*-tetrazole (38 mg, 0.54 mmol) were added and the mixture was stirred at room temperature for 2 h. After the completion of the reaction (TLC monitoring: CHCl<sub>3</sub>/CH<sub>3</sub>OH, 9.5:0.5), *t*-BuOOH (5.5 M in decane, 0.33 mL, 1.8 mmol) was added and the reaction was stirred for 2 h at room temperature (TLC monitoring: AcOEt/CH<sub>3</sub>OH, 8.5:1.5). The solvents were evaporated under reduced pressure and the crude product was purified over a silica gel column eluted with increasing

amounts of CH<sub>3</sub>OH in AcOEt (from 0 to 5%). The fractions were collected and the solvents removed under reduced pressure, affording the pure compound **9** (71 mg, 68% over two steps).

Oil; <sup>1</sup>H NMR (400 MHz, CD<sub>3</sub>OD, assignments by HH-COSY experiment)  $\delta$  8.32 (s, 1H, 2-H), 8.31 (s, 1H, 8-H), 6.16 (d,  $J = 2.9$  Hz, 1H, 1'-H), 5.29-5.23 (m, 1H, 2'-H), 5.03-4.98 (m, 1H, 3'-H), 4.38-4.32 (m, 1H, 4'-H), 4.30-4.23 (m, 4H, 2 x CNCH<sub>2</sub>CH<sub>2</sub>OP), 4.21-4.15 (m, 2H, CH<sub>2</sub>OP), 4.12 (t,  $J = 7.2$  Hz, 2H, CH<sub>2</sub>N), 3.76 (dd,  $J = 12.0, 3.8$  Hz, 1H, 5'-H<sub>a</sub>), 3.70 (dd,  $J = 12.0, 4.4$  Hz, 1H, 5'-H<sub>b</sub>), 2.90 (t,  $J = 5.8$  Hz, 2H, CH<sub>2</sub>CN), 1.90-1.74 (complex signal, 4H, 2 x CH<sub>2</sub>), 1.59 (s, 3H, CH<sub>3</sub>), 1.55-1.45 (m, 2H, CH<sub>2</sub>), 1.37 (s, 3H, CH<sub>3</sub>). <sup>13</sup>C NMR (100 MHz, CD<sub>3</sub>OD)  $\delta$  158.3, 149.7, 148.6, 141.3, 125.3, 118.5, 115.3, 92.4, 88.5, 85.9, 82.9, 69.9, 64.3, 63.3, 47.7, 30.6, 30.5, 30.0, 27.5, 25.3, 23.5, 20.2, 20.1. <sup>31</sup>P NMR (202 MHz, CD<sub>3</sub>OD)  $\delta$  -1.60 (s). HRESI-MS  $m/z$  581.2120 ([M+H]<sup>+</sup>, requires 581.2125); UV (H<sub>2</sub>O)  $\lambda_{\max}$  267 nm.

### **2',3'-O-Isopropylidene-N<sup>1</sup>-[5''-O-((2-cyanoethyl)phosphate)pentyl] inosine (10)**

Compound **9** (20 mg, 0.034 mmol) was dissolved in a mixture of TEA/pyridine (1:1, 1.0 mL) and the solution was kept at room temperature for 16 h (TLC monitoring: AcOEt/MeOH, 7:3). The solvents were evaporated under reduced pressure and the crude was coevaporated with pyridine (3 x 1 mL) to obtain compound **10** (18 mg, 90%) as pyridinium salt that was used for the next synthetic step without purification.

Oil. <sup>1</sup>H NMR (400 MHz, D<sub>2</sub>O, assignments by HH-COSY experiment)  $\delta$  8.56-8.50 (m, 2H, Py), 8.34 (s, 1H, 2-H), 8.30 (s, 1H, 8-H), 7.90-7.80 (m, 1H, Py), 7.48-7.40 (m, 2H, Py), 6.17 (d,  $J = 2.8$  Hz, 1H, 1'-H), 5.30-5.25 (m, 1H, 2'-H), 5.03-5.98 (m, 1H, 3'-H), 4.37-4.31 (m, 1H, 4'-H), 4.12 (t,  $J = 7.2$  Hz, 2H, CH<sub>2</sub>N), 4.03-3.96 (m, 2H, CH<sub>2</sub>OP), 4.02-3.96 (m, 2H, CNCH<sub>2</sub>CH<sub>2</sub>O), 3.75 (dd,  $J = 11.9, 3.9$  Hz, 1H, 5'-H<sub>a</sub>), 3.69 (dd,  $J = 11.9, 4.5$  Hz, 1H, 5'-H<sub>b</sub>), 2.77 (t,  $J = 6.0$  Hz, 2H, CH<sub>2</sub>CN), 1.88-1.78 (m, 2H, CH<sub>2</sub>), 1.74-1.65 (m, 2H, CH<sub>2</sub>), 1.59 (s, 3H, CH<sub>3</sub>), 1.54-1.44 (s, 3H, CH<sub>2</sub>), 1.37 (s, 3H, CH<sub>3</sub>). <sup>13</sup>C NMR (100 MHz, CD<sub>3</sub>OD)  $\delta$  158.2, 149.9, 149.5, 148.8, 141.2, 135.6, 124.9, 123.9, 118.6, 115.0, 92.7, 88.4, 86.2, 83.5, 69.5, 64.1, 63.3, 47.5, 30.9, 30.4, 30.2, 27.3, 25.4, 23.5, 20.1, 19.8. <sup>31</sup>P NMR (202 MHz, CD<sub>3</sub>OD)  $\delta$  -1.68 (s). HRESI-MS  $m/z$  526.1709 ([M-H]<sup>-</sup>, requires 526.1703); UV (H<sub>2</sub>O)  $\lambda_{\max}$  266 nm.

### **2',3'-O-Isopropylidene-N<sup>1</sup>-(5''-O-phosphate)inosine (11)**

Compound **9** (50 mg, 0.086 mmol) was dissolved in methanol/concentrated aqueous ammonia (1:1, 1.0 mL) and the reaction was allowed to stir at 50 °C for 16 h (TLC monitoring: isopropanol/ammonia/water, 6:3:1). The solvents were removed under reduced pressure and the crude was purified by a C-18 reversed-phase silica gel column, with increasing amount of CH<sub>3</sub>OH

in water (from 0 to 50%). The fractions were collected and the solvents removed under reduced pressure, affording pure compound **11** (30 mg, 72%) as ammonium salt.

Amorphous white solid.  $^1\text{H}$  NMR (400 MHz,  $\text{D}_2\text{O}$ , assignments by HH-COSY experiment)  $\delta$  8.41 (s, 1H, 2-H), 8.29 (s, 1H, 8-H), 6.29 (bs, 1H, 1'-H), 5.51-5.46 (m, 1H, 2'-H), 5.17-5.12 (m, 1H, 3'-H), 4.55-4.49 (m, 1H, 4'-H), 4.17 (t,  $J = 7.0$  Hz, 2H,  $\text{CH}_2\text{N}$ ), 3.92-3.85 (m, 2H,  $\text{CH}_2\text{OP}$ ), 3.84-3.74 (m, 2H, 5'- $\text{H}_{\text{a,b}}$ ), 1.90-1.80 (m, 2H,  $\text{CH}_2$ ), 1.73-1.66 (complex signal, 5H,  $\text{CH}_2$  and  $\text{CH}_3$ ), 1.51-1.43 (complex signal, 5H,  $\text{CH}_2$  and  $\text{CH}_3$ ).  $^{13}\text{C}$  NMR (100 MHz,  $\text{D}_2\text{O}$ )  $\delta$  157.9, 148.7, 147.3, 140.3, 123.7, 114.9, 90.3, 86.5, 83.6, 80.9, 80.7, 65.3, 61.4, 47.5, 29.3, 29.2, 28.4, 25.9, 24.2, 22.0.  $^{31}\text{P}$  NMR (202 MHz,  $\text{CD}_3\text{OD}$ )  $\delta$  1.84 (s). HRESI-MS  $m/z$  473.1441 ( $[\text{M}-\text{H}]^-$ , requires 473.1437); UV ( $\text{H}_2\text{O}$ )  $\lambda_{\text{max}}$  265 nm.

### **5'-*O*-*tert*-Butyldimethylsilyl-2',3'-*O*-isopropylidene-1-(2,4-dinitrophenyl)inosine(13)**

To a solution of **12** (1.2 g, 2.8 mmol) in DMF (12 mL),  $\text{K}_2\text{CO}_3$  (1.56 g, 1.1 mmol) and 2,4-dinitrochlorobenzene (2.3 g, 1.1 mmol) were added and the reaction was stirred for 4 h at 80 °C (TLC monitoring  $\text{CHCl}_3/\text{MeOH}$ , 9.5:0.5). The solvent was evaporated under reduced pressure and the crude was purified over a silica gel column eluted with increasing amounts of  $\text{CH}_3\text{OH}$  in  $\text{CHCl}_3$  (from 0 to 5%). The fractions were collected and the solvents removed under reduced pressure, affording pure compound **13** (1.0 g, 63%).

Yellow solid;  $^1\text{H}$  NMR (400 MHz,  $\text{CDCl}_3$ , assignments by HH-COSY experiment)  $\delta$  8.97 (s, 1H, ArH), 8.64-8.62 (m, 1H, ArH), 8.12-8.11 (m, 1H, 2-H), 8.06-8.05 (m, 1H, 8-H), 7.77-7.68 (m, 1H, ArH), 6.17-6.15 (m, 1H, 1'-H), 5.11-5.03 (m, 1H, 2'-H), 4.93-4.90 (m, 1H, 3'-H), 4.49-4.45 (m, 1H, 4'-H), 3.92-3.79 (m, 2H, 5'-H), 1.63 (s, 3H, isopropylidene), 1.39 (s, 3H, isopropylidene), 0.86-0.83 (s, 9H,  $(\text{CH}_3)_3\text{C}$ ), 0.043 (s, 3H,  $\text{CH}_3$ ), 0.027 (s, 3H,  $\text{CH}_3$ ) ppm.  $^{13}\text{C}$  NMR (100 MHz,  $\text{CDCl}_3$ )  $\delta$  155.1, 148.1, 147.0, 145.1, 139.0, 135.6, 132.9, 128.9, 124.3, 121.3, 114.3, 114.1, 92.0, 91.4, 87.5, 87.0, 85.7, 81.3, 63.6, 27.2, 25.8, 25.3, 18.3, -5.4; HRESI-MS  $m/z$  589.2085 ( $[\text{M}+\text{H}]^+$ , requires 589.2078); UV ( $\text{CHCl}_3$ )  $\lambda_{\text{max}}$  264 nm.

### **5'-*O*-*tert*-Butyldimethylsilyl-2',3'-*O*-isopropylidene-*N*<sup>1</sup>-(5-hydroxypentyl)inosine (14)**

To a solution of **13** (0.50 g, 0.85 mmol) in DMF (2.0 mL) 5-amino-1-pentanol (0.90 g, 8.5 mmol) was added and the mixture was stirred at 50 °C for 16 h (TLC monitoring  $\text{CHCl}_3/\text{MeOH}$ , 9.5:0.5). The solvent was evaporated under reduced pressure and the crude was purified over a silica gel column eluted with increasing amounts of  $\text{CH}_3\text{OH}$  in  $\text{CHCl}_3$  (from 0 to 5%). The fractions were

collected and the solvents removed under reduced pressure, affording pure compound **14** (0.33 g, 77%).

Yellow oil;  $^1\text{H}$  NMR (400 MHz,  $\text{CD}_3\text{OD}$ , assignments by HH-COSY experiment)  $\delta$  8.30 (s, 1H, 2-H), 8.20 (s, 1H, 8-H), 6.15 (d,  $J = 2.0$  Hz, 1H, 1'-H), 5.31-5.29 (m, 1H, 2'-H), 4.96-4.93 (m, 1H, 3'-H), 4.35-4.33 (m, 1H, 4'-H), 4.13-4.06 (m, 2H,  $\text{CH}_2\text{N}$ ), 3.84 (dd,  $J = 11.2, 4.1$  Hz, 2H, 5'- $\text{H}_a$ ), 3.77 (dd,  $J = 11.2, 4.7$  Hz, 2H, 5'- $\text{H}_b$ ), 3.54 (t,  $J = 6.0$  Hz, 2H,  $\text{CH}_2\text{O}$ ), 1.81-1.75 (m, 2H,  $\text{CH}_2$ ), 1.60-1.53 (complex signal, 3H,  $\text{CH}_2$  and isopropylidene), 1.46-1.38 (m, 2H,  $\text{CH}_2$ ), 1.36 (s, 3H, isopropylidene), 0.81 (s, 9H,  $(\text{CH}_3)_3\text{C}$ ), -0.0010 (s, 3H,  $\text{CH}_3$ ), -0.0070 (s, 3H,  $\text{CH}_3$ ).  $^{13}\text{C}$  NMR (100 MHz,  $\text{CD}_3\text{OD}$ )  $\delta$  158.1, 149.5, 148.5, 140.8, 125.3, 115.0, 92.5, 88.9, 86.1, 82.8, 64.7, 62.5, 47.8, 33.0, 30.5, 27.4, 26.3, 25.5, 23.8, 19.1, -5.3 ppm; HRESI-MS  $m/z$  509.2789 ( $[\text{M}+\text{H}]^+$ , requires 509.2795); UV ( $\text{H}_2\text{O}$ )  $\lambda_{\text{max}}$  265 nm.

#### **5'-*O*-*tert*-Butyldimethylsilyl-2',3'-*O*-isopropylidene-*N*<sup>1</sup>-(5-acetoxypentyl)inosine (15)**

Compound **14** (0.33 g, 0.65 mmol) was dissolved in a mixture of  $\text{Ac}_2\text{O}$ -pyridine (1:1, 2.0 mL) and the solution was kept at room temperature for 2 h (TLC monitoring:  $\text{CHCl}_3/\text{MeOH}$ , 9.5:0.5). The solvents were evaporated under reduced pressure to give compound **15** (0.35 g, 99%) that was used for the next synthetic step without purification.

Yellow oil;  $^1\text{H}$  NMR (400 MHz,  $\text{CD}_3\text{OD}$ , assignments by HH-COSY experiment)  $\delta$  8.31 (s, 1H, 2-H), 8.21 (s, 1H, 8-H), 6.16 (d,  $J = 2.0$  Hz, 1H, 1'-H), 5.32-5.30 (m, 1H, 2'-H), 4.97-4.95 (m, 1H, 3'-H), 4.37-4.35 (m, 1H, 4'-H), 4.15-4.09 (m, 2H,  $\text{CH}_2\text{N}$ ), 4.07-4.04 (t,  $J = 6.3$  Hz, 2H,  $\text{CH}_2\text{O}$ ), 3.85 (dd,  $J = 11.3, 4.1$  Hz, 1H, 5'- $\text{H}_a$ ), 3.78 (dd,  $J = 11.3, 4.7$  Hz, 1H, 5'- $\text{H}_b$ ), 2.00 (s, 3H,  $\text{CH}_3\text{CO}$ ), 1.86-1.76 (m, 2H,  $\text{CH}_2$ ), 1.73-1.65 (m, 2H,  $\text{CH}_2$ ), 1.58 (s, 3H, isopropylidene), 1.48-1.40 (m, 2H,  $\text{CH}_2$ ), 1.37 (s, 3H, isopropylidene), 0.82 ( $(\text{CH}_3)_3\text{C}$ ), 0.0050 (s, 3H,  $\text{CH}_3$ ), -0.0020 (s, 3H,  $\text{CH}_3$ ).  $^{13}\text{C}$  NMR (100 MHz,  $\text{CD}_3\text{OD}$ )  $\delta$  172.5, 157.9, 149.7, 149.4, 148.3, 140.75, 125.2, 114.9, 92.3, 88.8, 86.0, 82.7, 65.1, 64.6, 47.5, 30.2, 29.1, 27.5, 26.3, 25.5, 23.8, 22.0, 20.8, 20.8, 19.0, -5.2; HRESI-MS  $m/z$  551.2909 ( $[\text{M}+\text{H}]^+$ , requires 551.2901); UV ( $\text{H}_2\text{O}$ )  $\lambda_{\text{max}}$  266 nm.

#### **2',3'-*O*-Isopropylidene-*N*<sup>1</sup>-(5-acetoxypentyl)inosine (16)**

Compound **15** (0.30 g, 0.54 mmol) was dissolved in MeOH (10 mL) and then  $\text{NH}_4\text{F}$  (0.40 g, 11 mmol) was added. The reaction was refluxed for 16 h (TLC monitoring:  $\text{CHCl}_3/\text{MeOH}$ , 9.5:0.5). The solvent was evaporated under reduced pressure and the crude was purified over a silica gel

column eluted with increasing amounts of CH<sub>3</sub>OH in CHCl<sub>3</sub> (from 0 to 10%). The fractions were collected and the solvents removed under reduced pressure, affording pure compound **16** (0.21 g, 91%).

Yellow oil; <sup>1</sup>H NMR (400 MHz, CD<sub>3</sub>OD, assignments by HH-COSY experiment) δ 8.31 (s, 1H, 2-H), 8.30 (s, 1H, 8-H), 6.13 (d, *J* = 2.4 Hz, 1H, 1'-H), 5.24-5.22 (m, 1H, 2'-H), 4.99-4.97 (m, 1H, 3'-H), 4.32-4.30 (m, 1H, 4'-H), 4.08 (t, *J* = 7.4 Hz, 2H, CH<sub>2</sub>N), 4.03 (t, *J* = 6.3 Hz, 2H, CH<sub>2</sub>O), 3.76-3.68 (m, 2H, 5'-H<sub>a,b</sub>), 1.98 (s, 3H, CH<sub>3</sub>CO), 1.79-1.76 (m, 2H, CH<sub>2</sub>), 1.66-1.61 (m, 2H, CH<sub>2</sub>), 1.56 (s, 3H, isopropylidene), 1.44-1.38 (m, 2H, CH<sub>2</sub>), 1.34 (s, 3H, isopropylidene). <sup>13</sup>C NMR (100 MHz, CD<sub>3</sub>OD) δ 172.7, 158.0, 149.6, 148.4, 141.1, 125.2, 115.1, 92.2, 88.3, 85.8, 82.7, 65.2, 63.2, 47.6, 30.2, 29.1, 27.5, 25.5, 23.8, 20.8; HRESI-MS *m/z* 437.2041 ([M+H]<sup>+</sup>, requires 437.2036); UV (H<sub>2</sub>O) λ<sub>max</sub> 267 nm.

### **2',3'-*O*-Isopropylidene-*N*<sup>1</sup>-(5-acetoxypentyl)inosine 5'-bis(2-cyanoethyl) phosphate (**17**)**

Compound **16** (0.20 g, 0.46 mmol) was coevaporated with anhydrous benzene (3 x 2 mL) and then dissolved in anhydrous THF (4.0 mL). To this solution (iPr)<sub>2</sub>NP(OCE)<sub>2</sub> (0.25 g, 0.92 mmol) and tetrazole (0.10 g, 1.4 mmol) were added and the mixture was stirred at room temperature for 2 h. After the completion of the reaction (TLC monitoring: CHCl<sub>3</sub>/CH<sub>3</sub>OH, 9.5:0.5), *t*-BuOOH (5.5 M in decane, 0.80 mL, 4.6 mmol) was added and the reaction was stirred for 2 h at room temperature (TLC monitoring: CHCl<sub>3</sub>/CH<sub>3</sub>OH, 9.5:0.5). The solvents were evaporated under reduced pressure and the crude was purified over a silica gel column eluted with increasing amounts of CH<sub>3</sub>OH in CHCl<sub>3</sub> (from 0 to 10%). The fractions were collected and the solvents removed under reduced pressure, affording the pure compound **17** (0.23 g, 80% over two steps).

Yellow oil; <sup>1</sup>H NMR (400 MHz, CD<sub>3</sub>OD, assignments by HH-COSY experiment) δ 8.32 (s, 1H, 2-H), 8.20 (s, 1H, 8-H), 6.23 (d, *J* = 1.9 Hz, 1H, 1'-H), 5.46-5.41 (m, 1H, 2'-H), 5.16-5.10 (m, 1H, 3'-H), 4.52-4.46 (m, 1H, 4'-H), 4.40-4.05 (complex signal, 10H, 2 x CH<sub>2</sub>OP, 5'-H<sub>a,b</sub>, CH<sub>2</sub>O, CH<sub>2</sub>N), 2.93 (t, *J* = 5.8 Hz, 4H, 2 x CH<sub>2</sub>CN), 2.00 (s, 3H, CH<sub>3</sub>), 1.86-1.77 (m, 2H, CH<sub>2</sub>), 1.74-1.64 (m, 2H, CH<sub>2</sub>), 1.60 (s, 3H, isopropylidene), 1.50-1.41 (m, 2H, CH<sub>2</sub>), 1.39 (s, 3H, isopropylidene). <sup>13</sup>C NMR (100 MHz, CD<sub>3</sub>OD) δ 172.5, 158.1, 149.4, 148.1, 141.5, 125.6, 118.5, 115.5, 92.4, 88.6, 85.7, 82.5, 66.8, 64.9, 62.6, 47.7, 30.3, 29.5, 27.7, 25.4, 22.7, 20.9; <sup>31</sup>P NMR (202 MHz, CD<sub>3</sub>OD) δ -1.53 (s). HRESI-MS *m/z* 623.2237 ([M+H]<sup>+</sup>, requires 623.2231); UV (H<sub>2</sub>O) λ<sub>max</sub> 265 nm.

### **2',3'-*O*-Isopropylidene-*N*<sup>1</sup>-(5-hydroxypentyl)inosine 5'-monophosphate (18)**

Compound **17** (0.10 g, 0.16 mmol) was dissolved in methanol/concentrated aqueous ammonia (1:1, 2.0 mL) and the reaction was allowed to stir at 50 °C for 16 h (TLC monitoring: isopropanol/ammonia/water, 6:3:1). The solvents were removed under reduced pressure and the crude was purified by a C-18 reversed-phase silica gel column with increasing amount of CH<sub>3</sub>OH in water (from 0 to 50%). The fractions were collected and the solvents removed under reduced pressure, affording the pure compound **18** (55 mg, 70%) as ammonium salt.

Amorphous white solid; <sup>1</sup>H NMR (400 MHz, CD<sub>3</sub>OD, assignments by HH-COSY experiment) δ 8.49 (s, 1H, 2-H), 8.31 (s, 1H, 8-H), 6.17 (d, *J* = 3.1 Hz, 1H, 1'-H), 5.35-5.30 (m, 1H, 2'-H), 5.18-5.12 (m, 1H, 3'-H), 4.51-4.47 (m, 1H, 4'-H), 4.14-4.07 (t, *J* = 7.2 Hz, 2H, CH<sub>2</sub>N), 4.04-3.98 (m, 2H, 5'-H<sub>a,b</sub>), 3.55 (t, *J* = 6.4 Hz, 2H, CH<sub>2</sub>O), 1.86-1.76 (m, 2H, CH<sub>2</sub>), 1.62-1.54 (complex signal, 5H, CH<sub>2</sub> and isopropylidene), 1.37 (s, 3H, isopropylidene); <sup>13</sup>C NMR (100 MHz, CD<sub>3</sub>OD), 157.9, 148.7, 147.3, 140.3, 123.7, 114.9, 90.3, 86.5, 83.6, 80.9, 80.7, 65.3, 61.4, 47.5, 29.3, 29.2, 28.4, 25.9, 24.2, 22.0; <sup>31</sup>P NMR (202 MHz, CD<sub>3</sub>OD) δ 1.84 (s). HRESI-MS *m/z* 473.1443 ([M-H]<sup>-</sup>, requires 473.1437); UV (H<sub>2</sub>O) λ<sub>max</sub> 267 nm.

### **2',3'-*O*-isopropylidene-*N*<sup>1</sup>-pentylinosine cyclic 5',5''-phosphate (19)**

Compound **18** (20 mg, 0.040 mmol) was dissolved in DMF (20 mL) and then EDC (9.6 mg, 0.050 mmol) was added. The reaction was allowed to stir for 48 h at room temperature (TLC monitoring: isopropanol/ammonia/water, 6:3:1). After removing the solvent under reduced pressure, the crude was dissolved in 1 mL of TEAB 0.1 M and then purified by HPLC (see General). The fractions containing the title compound were collected, concentrated and finally lyophilized to afford compound **19** (6.6 mg, 30%) as triethylammonium salt.

Amorphous white solid; <sup>1</sup>H NMR (400 MHz, D<sub>2</sub>O, assignments by HH-COSY experiment) δ 8.43 (s, 1H, 2-H), 8.31 (s, 1H, 8-H), 6.32 (bs, 1H, 1'-H), 5.77-5.72 (m, 1H, 2'-H), 5.21-5.16 (m, 1H, 3'-H), 4.53-4.49 (m, 1H, 4'-H), 4.19 (t, *J* = 7.3 Hz, 2H, CH<sub>2</sub>N), 4.04-3.98 (m, 2H, 5'-H<sub>a,b</sub>), 3.92-3.85 (m, 2H, CH<sub>2</sub>OP), 3.22 (q, *J* = 7.3 Hz, 6H, CH<sub>2</sub> of triethylammonium), 1.90-1.80 (m, 2H, CH<sub>2</sub>), 1.75-1.68 (complex signal, 5H, CH<sub>2</sub> and CH<sub>3</sub>), 1.53-1.45 (complex signal, 5H, CH<sub>2</sub> and CH<sub>3</sub>), 1.29 (t, *J* = 7.3 Hz, 9H, CH<sub>3</sub> of triethylammonium). <sup>13</sup>C NMR (100 MHz, D<sub>2</sub>O) δ 157.7, 148.5, 147.6, 140.2, 122.9, 115.2, 90.1, 86.7, 83.4, 80.7, 65.3, 64.7, 47.2, 29.1, 28.6, 28.4, 25.7, 24.1, 22.0; <sup>31</sup>P NMR (202 MHz, CD<sub>3</sub>OD) δ -1.84 (s). HRESI-MS *m/z* 455.1341 ([M-H]<sup>-</sup>, requires 455.1337); UV (H<sub>2</sub>O) λ<sub>max</sub> 269 nm.

#### ***N*<sup>1</sup>-Pentylinosine cyclic 5',5''-phosphate (4)**

Compound **19** (5.0 mg, 0.0090 mmol) was dissolved in a mixture of TFA-H<sub>2</sub>O (2:8, 0.5 mL) and the reaction was allowed to stir for 16 h at room temperature (TLC monitoring: isopropanol/ammonia/water, 6:3:1). After removing the solvents under reduced pressure, the crude was dissolved in 0.5 mL of TEAB 0.1 M and then purified by HPLC (see General). The fractions containing the title compound were collected, concentrated and finally lyophilized to afford compound **4** (3.7 mg, 80%) as triethylammonium salt.

Amorphous white solid. <sup>1</sup>H NMR (400 MHz, D<sub>2</sub>O, assignments by HH-COSY experiment) δ 8.39 (s, 1H, 2-H), 8.35 (s, 1H, 8-H), 6.21 (bs, 1H, 1'-H), 5.40-5.35 (m, 1H, 2'-H), 4.53-4.49 (m, 1H, 3'-H), 4.45-4.40 (m, 1H, 4'-H), 4.17 (t, *J* = 7.1 Hz, 2H, CH<sub>2</sub>N), 4.02-3.97 (m, 2H, 5'-H<sub>a,b</sub>), 3.90-3.85 (m, 2H, CH<sub>2</sub>OP), 3.25 (q, *J* = 7.3 Hz, 6H, CH<sub>2</sub> of triethylammonium), 1.88-1.78 (m, 2H, CH<sub>2</sub>), 1.67-1.56 (m, 2H, CH<sub>2</sub>), 1.46-1.38 (m, 2H, CH<sub>2</sub>), 1.31 (t, *J* = 7.3 Hz, 9H, CH<sub>3</sub> of triethylammonium). <sup>13</sup>C NMR (100 MHz, D<sub>2</sub>O) δ 156.9, 149.9, 148.2, 140.2, 122.7, 88.5, 83.9, 74.6, 69.9, 65.0, 64.5, 47.4, 30.7, 28.3, 22.0; <sup>31</sup>P NMR (202 MHz, CD<sub>3</sub>OD) δ -1.88 (s). HRESI-MS *m/z* 415.1029 ([M-H]<sup>-</sup>, requires 415.1024); UV (H<sub>2</sub>O) λ<sub>max</sub> 269 nm.
